# Supplementary material for: Relationship between Brain-Derived Neurotrophic Factor and Cognitive Decline in Patients with Mild Cognitive Impairment and Dementia
Source: MDPI journal article supplement (doi:10.3390/biom13030570), 2023-03-21
Supplement: s1 [file s1]

## Article

# Relationship between Brain-Derived Neurotrophic Factor and Cognitive Decline in Patients with Mild Cognitive Impairment and Dementia

Matea Nikolac Perkovic <sup>1</sup>, Fran Borovecki <sup>2,3</sup>, Igor Filipcic <sup>4</sup>, Barbara Vuic <sup>1</sup>, Tina Milos <sup>1</sup>, Gordana Nedic Erjavec <sup>1</sup>, Marcela Konjevod <sup>1</sup>, Lucija Tudor <sup>1</sup>, Ninoslav Mimica <sup>3,5</sup>, Suzana Uzun <sup>3,5</sup>, Oliver Kozumplik <sup>5</sup>, Dubravka Svob Strac <sup>1</sup> and Nela Pivac <sup>1,6,\*</sup>

<sup>1</sup> Laboratory for Molecular Neuropsychiatry, Division of Molecular Medicine, Ruder Boskovic Institute, 10000 Zagreb, Croatia; mnikolac@irb.hr (M.N.P.); barbara.vuic@irb.hr (B.V.); tina.milos@irb.hr (T.M.); gnedic@irb.hr (G.N.E.); mkonjev@irb.hr (M.K.); ltudor@irb.hr (L.T.); dsvob@irb.hr (D.S.S.)

<sup>2</sup> Department of Neurology, University Hospital Centre Zagreb, 10000 Zagreb, Croatia; fbor@mef.hr

<sup>3</sup> School of Medicine, University of Zagreb, 10000 Zagreb, Croatia; ninoslav.mimica@bolnica-vrapce.hr (N.M.); suzana.uzun@bolnica-vrapce.hr (S.U.)

<sup>4</sup> Psychiatric Hospital "Sveti Ivan", 10090 Zagreb, Croatia; igor.filipcic@pbsvi.hr

<sup>5</sup> Department for Biological Psychiatry and Psychogeriatrics, University Psychiatric Hospital Vrapče, 10090 Zagreb, Croatia; oliver.kozumplik@bolnica-vrapce.hr

<sup>6</sup> University of Applied Sciences Hrvatsko Zagorje Krapina, 49000 Krapina, Croatia

\* Correspondence: npivac@irb.hr

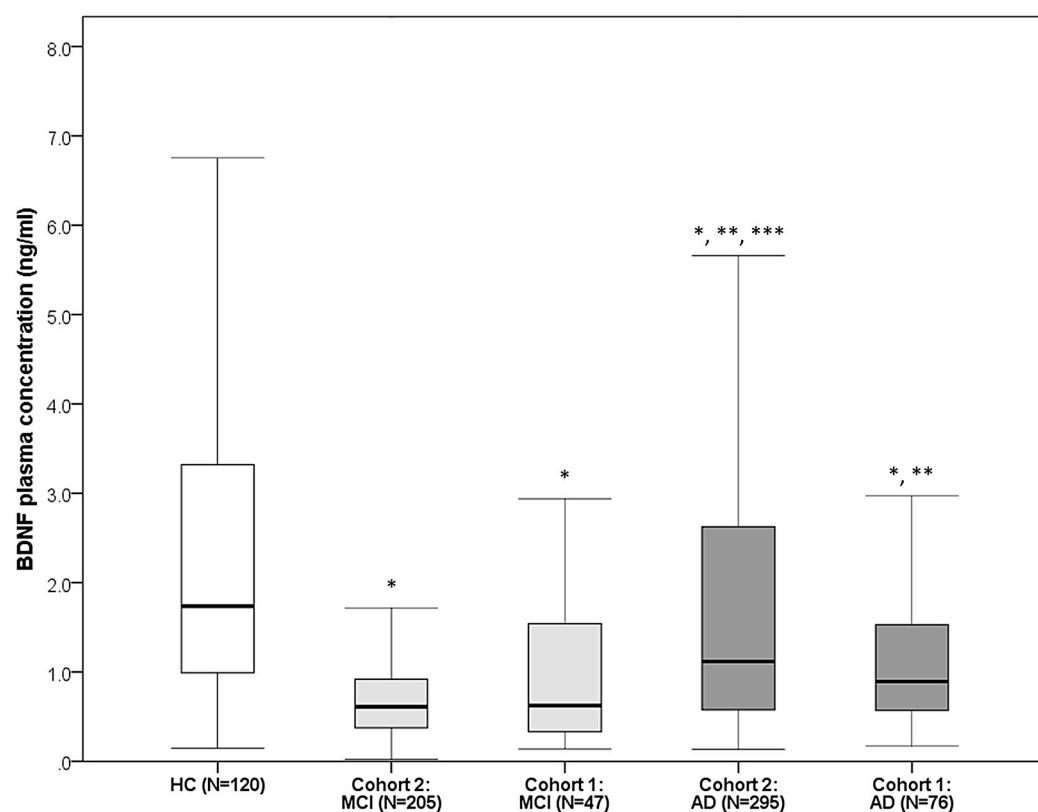

**Figure S1.** Comparison of the results (Kruskal-Wallis ANOVA by ranks), concerning BDNF plasma concentration in MCI subjects and patients diagnosed with AD, between current study (cohort 2) and previous study by Domitrovic Sudic and colleagues [59] (cohort 1).

AD, Alzheimer's Disease; BDNF, Brain-Derived Neurotrophic Factor; HC, Healthy Control; MCI, Mild Cognitive Impairment

\*  $p \leq 0.001$  vs. HC (Dunn's post-hoc test)

\*\*  $p \leq 0.001$  vs. MCI, Cohort 2 (Dunn's post-hoc test)

\*\*\*  $p < 0.050$  vs. MCI, Cohort 1 (Dunn's post-hoc test)
